# Supplementary material
Source: PubMed Central journal article supplement (PMC9793343)
Supplement: NIHMS1855434-supplement-Suppl_Table1.pdf [file NIHMS1855434-supplement-Suppl_Table1.pdf]

**Supplementary Table 1. Primer sequences**

| strand | Gene   | Accession#   | sequence                           | exon | amplicon (bp) |
|--------|--------|--------------|------------------------------------|------|---------------|
| s      | Kcnma1 | NM_001253371 | CTT CAC AAC ATC TCC CCT AAC        | 11   | 135           |
| as     |        |              | C                                  | 13   |               |
| s      | Prox1  | NM_008937    | GTA AGA CAT CAC CGC GTG C          | 1    | 218           |
| as     |        |              | TCA TGG TCA GGC ATC ACT GG         | 2    |               |
| s      | Nos3   | NM_008713    | CTG CCA CCT GAT CCT AAC TTG        | 23   | 143           |
| as     |        |              | CAG CCA AAC ACC AAA GTC ATG        | 24   |               |
| s      | Acta2  | NM_007392    | GAG CTA CGA ACT GCC TGA C          | 7    | 129           |
| as     |        |              | CTG TTA TAG GTG GTT TCG TGG<br>A   | 9    |               |
| s      | Myh11  | NM_013607    | AAG CTG CGG CTA GAG GTC A          | 33   | 238           |
| as     |        |              | CCC TCC CTT TGA TGG CTG AG         | 34   |               |
| s      | Kcnn1  | NM_032397    | GCT CAG AAG CTC CGA AGT GT         | 6    | 352           |
| as     |        |              | GAT GGA GCA GTC TAGC GGT C         | 9    |               |
| s      | Kcnn2  | NM_080465    | ACC CTA GTG GAT CTG GCAAAG         | 7    | 242           |
| as     |        |              | GAG CGC TCA GCA TTG TAG GA         | 8    |               |
| s      | Kcnn3  | NM_080466    | GAC ATC AGC GCA AGA TGC TG         | 2    | 294           |
| as     |        |              | GCC CGA GAT GGG GTA TAG GA         | 3    |               |
| s      | Kcnn4  | NM_008433    | GAC CGA ACT GTC TTG GGG TT         | 6    | 290           |
| as     |        |              | CTT CTG TGA GTT CAT GTG GAG<br>C   | 9    |               |
| s      | Kcnj8  | NM_008428    | GTC ACA CGC TGG TCA TCT TCA<br>C   | 2    | 249           |
| as     |        |              | GGC ATT CCT CAG TCA TCA TTC<br>TCC | 3    |               |

bp: base pair
